# Supplementary material for: Phosphine ligand triggered oxidative decarbonylative homocoupling of aromatic aldehydes: selectively generating biaryls and diarylketones
Source: Royal Society of Chemistry journal article supplement (doi:10.1039/c0cc04921b), 2011-01-01

Electronic supplementary information

# Phosphine Ligand Triggered Oxidative Decarbonylative Homocoupling of Aromatic Aldehydes: Selectively Generating Biaryls and Diarylketones

Luo Yang, Tieqiang Zeng, Qi Shuai, Xiangyu Guo, and Chao-Jun Li\*

*Department of Chemistry, McGill University, Montreal, QC, Canada H3A 2K6*

E-mail: cj.li@mcgill.ca

## Table of Contents

|                                                                                                             |               |
|-------------------------------------------------------------------------------------------------------------|---------------|
| <b>1. General information</b>                                                                               | <b>S1</b>     |
| <b>2. The influence of solvents and concentrations to the homocoupling</b>                                  | <b>S2</b>     |
| <b>3. General experimental procedure for the homocoupling and characterization data</b>                     | <b>S3-S7</b>  |
| <b>4. References</b>                                                                                        | <b>S7-S8</b>  |
| <b>5. Copies of <sup>1</sup>H and <sup>13</sup>C NMR spectra of products 2a-6l, 3a-3c, 3e-3h, 3k, 3m-3p</b> | <b>S9-S32</b> |

### 1. General information

Thin-layer chromatography (TLC) was performed using E. Merck silica gel 60 F254 pre-coated plates (0.25 mm) or Sorbent Silica Gel 60 F254 plates. The developed chromatography was analyzed by UV lamp (254 nm). GCMS analysis was conducted on an Agilent GCMS-6890N instrument equipped with a HP-5 column (30 m × 0.25 mm, Hewlett-Packard) and Agilent 5973 Mass Selective Detector. High-resolution mass spectra (HRMS) were obtained from a JEOL JMS-700 instrument (ESI). IR spectra were recorded by a Nexus 670 Avator FTIR spectrometer. Nuclear magnetic resonance (NMR) spectra were recorded on Varian MERCURY plus spectrometer (<sup>1</sup>H 500 MHz, <sup>13</sup>C 125 MHz or <sup>13</sup>C 75 MHz) spectrometer. NMR yield was calculated based on the integration using nitromethane as internal standard. Chemical shifts for <sup>1</sup>H NMR spectra are reported in parts per million (ppm) from tetramethylsilane with

the solvent resonance as the internal standard (chloroform:  $\delta$  7.26 ppm). Chemical shifts for  $^{13}\text{C}$  NMR spectra are reported in parts per million (ppm) from tetramethylsilane with the solvent as the internal standard ( $\text{CDCl}_3$ :  $\delta$  77.23 ppm). Data are reported as following: chemical shift, multiplicity (s = singlet, d = doublet, dd = doublet of doublets, t = triplet, q = quartet, m = multiplet, br = broad signal), coupling constant (Hz), and integration.

**Reagents:** Unless stated otherwise, liquid aromatic aldehydes were used after distillation under vacuum. Solid aromatic aldehydes, rhodium catalysts and phosphine ligands were used without further purification. Benzene was dried by sodium metal using benzophenone as the indicator.

## 2. The influence of solvents and concentrations to the homocoupling <sup>a</sup>

**Table S1. Detailed Optimization of the Oxidative Decarbonylative Homocoupling**

$$\begin{array}{c}
 2 \text{ ArCHO} \\
 \mathbf{1a}
 \end{array}
 \xrightarrow[\text{Ar} = p\text{-CH}_3\text{OC}_6\text{H}_4]{\text{[Rh], TBP, solvent, 150 }^\circ\text{C}}
 \begin{array}{c}
 \text{Ar-Ar} \\
 \mathbf{2a}
 \end{array}
 +
 \begin{array}{c}
 \text{O} \\
 \parallel \\
 \text{Ar-C-Ar} \\
 \mathbf{3a}
 \end{array}$$

| entry | Rh (mol%)                                           | ligand (mol%)      | Solvent /mL        | Temp / $^\circ\text{C}$ | yield $\mathbf{2a} + \mathbf{3a}$ | ratio <sup>b</sup> $\mathbf{2a} / \mathbf{3a}$ |
|-------|-----------------------------------------------------|--------------------|--------------------|-------------------------|-----------------------------------|------------------------------------------------|
| 1     | $[(\text{CO})_2\text{RhCl}]_2$ (1.25)               | $\text{PPh}_3$ (6) | PhCl 0.4           | 150                     | 55                                | 52 : 48                                        |
| 2     | $[(\text{CO})_2\text{RhCl}]_2$ (1.25)               | $\text{PPh}_3$ (6) | dioxane 0.4        | 150                     | 44                                | 59 : 41                                        |
| 3     | $[(\text{CO})_2\text{RhCl}]_2$ (1.25)               | $\text{PPh}_3$ (6) | DCE 0.4            | 150                     | 69                                | 62 : 38                                        |
| 4     | $[(\text{CO})_2\text{RhCl}]_2$ (1.25)               | $\text{PPh}_3$ (6) | benzene <b>0.8</b> | 150                     | 73                                | 72 : 28                                        |
| 5     | $[(\text{CO})_2\text{RhCl}]_2$ (1.25)               | $\text{PPh}_3$ (6) | benzene 0.4        | <b>140</b>              | 76                                | 84 : 16                                        |
| 6     | $[(\text{CO})_2\text{RhCl}]_2$ (1.25)               | dppe (3)           | PhCl 0.4           | 150                     | 45                                | 19 : 81                                        |
| 7     | $[(\text{CO})_2\text{RhCl}]_2$ (1.25)               | dppe (3)           | dioxane 0.4        | 150                     | 33                                | <2 : 98                                        |
| 8     | $[(\text{CO})_2\text{RhCl}]_2$ (1.25)               | dppe (3)           | benzene <b>0.8</b> | 150                     | 44                                | <2 : 98                                        |
| 9     | $[(\text{CO})_2\text{RhCl}]_2$ (1.25)               | dppe (3)           | benzene 0.4        | <b>140</b>              | 56                                | <2 : 98                                        |
| 10    | $[(\text{CH}_2=\text{CH}_2)_2\text{RhCl}]_2$ (1.25) | $\text{PPh}_3$ (6) | benzene 0.4        | <b>150</b>              | 65                                | 71 : 29                                        |
| 11    | $[(\text{CH}_2=\text{CH}_2)_2\text{RhCl}]_2$ (1.25) | dppe (3)           | benzene 0.4        | <b>160</b>              | 58                                | 57 : 43                                        |

<sup>a</sup> Conditions: **1a** (0.2 mmol), [Rh], phosphine ligand, TBP (0.5 mmol) and solvent, sealed and stirred for 12 h under argon, unless otherwise noted. <sup>b</sup> Determined by  $^1\text{H}$  NMR analysis of the crude reaction mixture using an internal standard.

### 3. General experimental procedure for the oxidative decarbonylative homocoupling of aromatic aldehydes and characterization data

A general experimental procedure for the decarbonylative coupling is described as following: An oven-dried reaction vessel was charged with  $[(\text{CO})_2\text{RhCl}]_2$  (0.9 mg, 0.0025 mmol, 1.25 mol%),  $\text{PPh}_3$  (0.9 mg, 0.012 mmol, 6.0 mol%) and benzene (dried over Na) (0.4 mL). After stirring the mixture at r.t. for 12 h under argon, 4-methoxybenzaldehyde **1a** (25  $\mu\text{L}$ , 29.8 mg, 0.2 mmol) was added by syringe and the vessel was sealed and heated at 150 °C (oil bath temperature). After 12 h, the resulting mixture was cooled to room temperature, filtered through a short silica gel pad and washed by ethyl acetate. The above solution was evaporated under vacuum and the ratio of the two products was determined by  $^1\text{H}$  NMR using nitromethane as the internal standard. Then the mixture was transferred to silica gel column directly and eluted with hexanes and ethyl acetate (90:10) to give products **2a** and **3a** (36 mg, 82% yield).

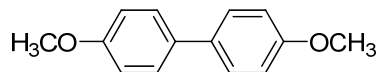

**2a**<sup>[1]</sup>: white solid, mp 160 °C;  $^1\text{H}$  NMR (500 MHz,  $\text{CDCl}_3$ , TMS)  $\delta$  (ppm) 7.48 (d,  $J=8.5$  Hz, 4H), 6.96 (d,  $J=8.5$  Hz, 4H), 3.85 (s, 6H);  $^{13}\text{C}$  NMR (125 MHz,  $\text{CDCl}_3$ , TMS)  $\delta$  (ppm) 158.9, 133.7, 128.0, 114.4, 55.6.

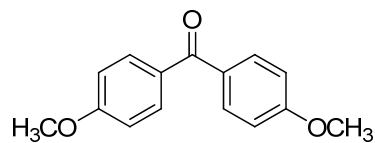

**3a**<sup>[6]</sup>: white solid, mp 142 °C;  $^1\text{H}$  NMR (500 MHz,  $\text{CDCl}_3$ , TMS)  $\delta$  (ppm) 7.79 (dt,  $J=3.0, 8.5$  Hz, 4H), 6.96 (dt,  $J=3.0, 8.5$  Hz, 4H), 3.88 (s, 6H);  $^{13}\text{C}$  NMR (125 MHz,  $\text{CDCl}_3$ , TMS)  $\delta$  (ppm) 194.7, 163.0, 132.4, 131.0, 113.6, 55.7.

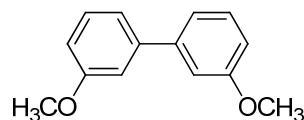

**2b**<sup>[2]</sup>: colorless oil;  $^1\text{H}$  NMR (500 MHz,  $\text{CDCl}_3$ , TMS)  $\delta$  (ppm) 7.35 (t,  $J=8.0$  Hz, 2H),

7.18 (ddd,  $J=1.0, 1.5, 8.0$  Hz, 2H), 7.12 (t,  $J=2.5$  Hz, 2H), 6.91 (ddd,  $J=1.0, 3.0, 8.0$  Hz, 4H), 3.87 (s, 6H);  $^{13}\text{C}$  NMR (125 MHz,  $\text{CDCl}_3$ , TMS)  $\delta$  (ppm) 160.1, 142.9, 129.9, 119.9, 113.2, 113.0, 55.5.

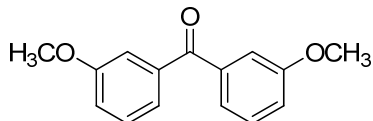

**3b**<sup>[10]</sup>: colorless oil;  $^1\text{H}$  NMR (500 MHz,  $\text{CDCl}_3$ , TMS)  $\delta$  (ppm) 7.39-7.33 (m, 6H), 7.13 (ddd,  $J=1.5, 3.0, 8.0$  Hz, 2H), 3.86 (s, 6H);  $^{13}\text{C}$  NMR (125 MHz,  $\text{CDCl}_3$ , TMS)  $\delta$  (ppm) 195.5, 159.8, 139.1, 129.4, 123.1, 119.1, 114.5, 55.7.

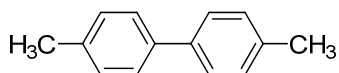

**2c**<sup>[11]</sup>: white solid, mp 116 °C;  $^1\text{H}$  NMR (500 MHz,  $\text{CDCl}_3$ , TMS)  $\delta$  (ppm) 7.48 (dt,  $J=2.0, 8.0$  Hz, 4H), 7.24 (dt,  $J=2.0, 8.0$  Hz, 4H), 2.39 (s, 6H);  $^{13}\text{C}$  NMR (125 MHz,  $\text{CDCl}_3$ , TMS)  $\delta$  (ppm) 138.5, 136.9, 129.6, 127.0, 21.3.

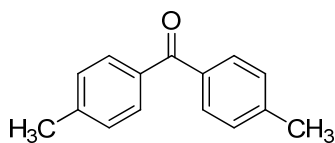

**3c**<sup>[6]</sup>: white solid, mp 92 °C;  $^1\text{H}$  NMR (500 MHz,  $\text{CDCl}_3$ , TMS)  $\delta$  (ppm) 7.70 (d,  $J=8.0$  Hz, 4H), 7.28 (d,  $J=8.0$  Hz, 4H), 2.44 (s, 6H);  $^{13}\text{C}$  NMR (125 MHz,  $\text{CDCl}_3$ , TMS)  $\delta$  (ppm) 196.3, 142.9, 135.2, 130.2, 128.9, 21.6.

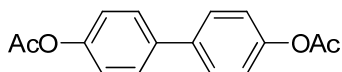

**2d**<sup>[4]</sup>: white solid, mp 150 °C;  $^1\text{H}$  NMR (500 MHz,  $\text{CDCl}_3$ , TMS)  $\delta$  (ppm) 7.55 (dt,  $J=2.5, 8.0$  Hz, 4H), 7.16 (dt,  $J=2.5, 8.0$  Hz, 4H), 2.33 (s, 6H);  $^{13}\text{C}$  NMR (125 MHz,  $\text{CDCl}_3$ , TMS)  $\delta$  (ppm) 169.8, 150.4, 138.4, 128.4, 122.1, 21.4.

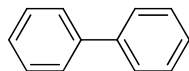

**2e**<sup>[11]</sup>: white solid, mp 70 °C;  $^1\text{H}$  NMR (500 MHz,  $\text{CDCl}_3$ , TMS)  $\delta$  (ppm) 7.59-7.61 (m, 4H), 7.43-7.46 (m, 4H), 7.34-7.37 (m, 2H);  $^{13}\text{C}$  NMR (125 MHz,  $\text{CDCl}_3$ , TMS)  $\delta$  (ppm) 141.5, 129.0, 127.5, 127.4.

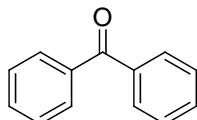

**3e**<sup>[6]</sup>: white solid, mp 48 °C; <sup>1</sup>H NMR (500 MHz, CDCl<sub>3</sub>, TMS) δ (ppm) 7.80-7.82 (m, 4H), 7.57-7.61 (m, 2H), 7.47-7.50 (m, 4H); <sup>13</sup>C NMR (125 MHz, CDCl<sub>3</sub>, TMS) δ (ppm) 196.9, 137.8, 132.6, 130.2, 128.4.

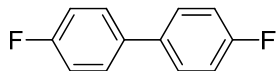

**2f**<sup>[11]</sup>: white solid, mp 86 °C; <sup>1</sup>H NMR (500 MHz, CDCl<sub>3</sub>, TMS) δ (ppm) 7.48-7.50 (m, 4H), 7.10-7.14 (m, 4H); <sup>13</sup>C NMR (125 MHz, CDCl<sub>3</sub>, TMS) δ (ppm) 162.6 (d, *J*=245.0 Hz), 136.6 (d, *J*=3.2 Hz), 128.8 (d, *J*=7.9 Hz), 115.9 (d, *J*=21.2 Hz).

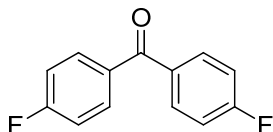

**3f**<sup>[7]</sup>: white solid, mp 104 °C; <sup>1</sup>H NMR (500 MHz, CDCl<sub>3</sub>, TMS) δ (ppm) 7.80-7.84 (m, 4H), 7.15-7.20 (m, 4H); <sup>13</sup>C NMR (125 MHz, CDCl<sub>3</sub>, TMS) δ (ppm) 194.0, 165.6 (d, *J*=253.5 Hz), 133.9 (d, *J*=3.2 Hz), 132.7 (d, *J*=9.2 Hz), 115.8 (d, *J*=21.8 Hz).

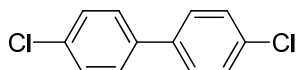

**2g**<sup>[3]</sup>: white solid, mp 145 °C; <sup>1</sup>H NMR (500 MHz, CDCl<sub>3</sub>, TMS) δ (ppm) 7.56 (dt, *J*=2.0, 8.0 Hz, 4H), 7.42 (dt, *J*=2.0, 8.0 Hz, 4H); <sup>13</sup>C NMR (125 MHz, CDCl<sub>3</sub>, TMS) δ (ppm) 138.6, 134.0, 129.3, 128.4.

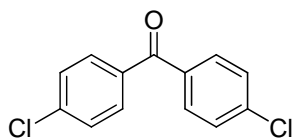

**3g**<sup>[11]</sup>: white solid, mp 144 °C; <sup>1</sup>H NMR (500 MHz, CDCl<sub>3</sub>, TMS) δ (ppm) 7.73 (dt, *J*=2.0, 8.5 Hz, 4H), 7.47 (dt, *J*=2.0, 8.5 Hz, 4H); <sup>13</sup>C NMR (125 MHz, CDCl<sub>3</sub>, TMS) δ (ppm) 194.5, 135.7, 131.5, 129.0.

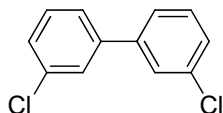

**2h**<sup>[3]</sup>: colorless oil; <sup>1</sup>H NMR (500 MHz, CDCl<sub>3</sub>, TMS) δ (ppm) 7.55 (t, *J*=2.0 Hz, 2H), 7.44 (dt, *J*=1.5, 8.0 Hz, 2H), 7.38 (t, *J*=8.0 Hz, 2H), 7.35 (dt, *J*=1.5, 8.0 Hz, 2H); <sup>13</sup>C NMR (125 MHz, CDCl<sub>3</sub>, TMS) δ (ppm) 141.8, 135.0, 130.3, 128.1, 127.5, 125.5.

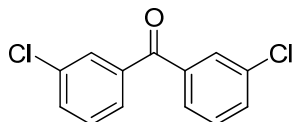

**3h**<sup>[8]</sup>: white solid, mp 170 °C; <sup>1</sup>H NMR (500 MHz, CDCl<sub>3</sub>, TMS) δ (ppm) 7.74 (t, *J*=2.0Hz, 2H), 7.65 (dt, *J*=1.0, 8.0 Hz, 2H), 7.59 (ddd, *J*=1.0, 2.0, 8.0Hz, 2H), 7.35 (t, *J*=8.0 Hz, 2H); <sup>13</sup>C NMR (125 MHz, CDCl<sub>3</sub>, TMS) δ (ppm) 194.0, 138.8, 135.0, 133.0, 130.05, 130.0, 128.3.

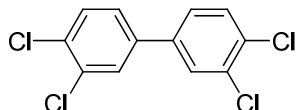

**2i**<sup>[5]</sup>: white solid, mp 170 °C; <sup>1</sup>H NMR (500 MHz, CDCl<sub>3</sub>, TMS) δ (ppm) 7.62 (d, *J*=2.5Hz, 2H), 7.52 (d, *J*=8.5 Hz, 2H), 7.36 (dd, *J*=3.0, 11.0Hz, 2H); <sup>13</sup>C NMR (125 MHz, CDCl<sub>3</sub>, TMS) δ (ppm) 138.9, 133.4, 132.7, 131.2, 129.0, 126.3.

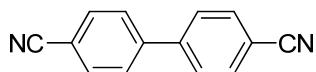

**2j**<sup>[11]</sup>: white solid, mp 220 °C; <sup>1</sup>H NMR (500 MHz, CDCl<sub>3</sub>, TMS) δ (ppm) 7.78 (dt, *J*=2.0, 8.5Hz, 4H), 7.69 (dt, *J*=2.0, 8.5 Hz, 4H); <sup>13</sup>C NMR (125 MHz, CDCl<sub>3</sub>, TMS) δ (ppm) 143.7, 133.1, 128.2, 118.6, 112.7.

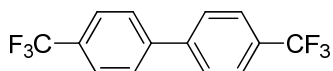

**2k**<sup>[2]</sup>: white solid, mp 80 °C; <sup>1</sup>H NMR (500 MHz, CDCl<sub>3</sub>, TMS) δ (ppm) 7.74 (d, *J*=8.5Hz, 4H), 7.71 (d, *J*=8.5 Hz, 4H); <sup>13</sup>C NMR (125 MHz, CDCl<sub>3</sub>, TMS) δ (ppm) 143.5, 130.5 (d, *J*=32.3Hz), 127.9, 126.2 (q, *J*=3.6Hz), 124.3 (d, *J*=270.6Hz).

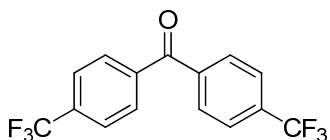

**3k**<sup>[10]</sup>: white solid, mp 110 °C; <sup>1</sup>H NMR (500 MHz, CDCl<sub>3</sub>, TMS) δ (ppm) 7.91 (d, *J*=8.5Hz, 4H), 7.79 (d, *J*=8.5 Hz, 4H); <sup>13</sup>C NMR (125 MHz, CDCl<sub>3</sub>, TMS) δ (ppm) 194.6, 140.0, 134.6 (d, *J*=32.9Hz), 130.4, 125.8 (q, *J*=3.8Hz), 123.7 (d, *J*=271.1Hz).

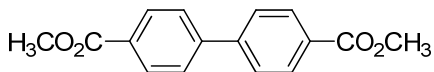

**2l**<sup>[11]</sup>: white solid, mp 210 °C; <sup>1</sup>H NMR (500 MHz, CDCl<sub>3</sub>, TMS) δ (ppm) 8.13 (dt, *J*=2.0, 8.5Hz, 4H), 7.69 (dt, *J*=2.0, 8.5 Hz, 4H), 3.95 (s, 6H); <sup>13</sup>C NMR (125 MHz,

CDCl<sub>3</sub>, TMS)  $\delta$  (ppm) 167.0, 144.6, 130.4, 129.9, 127.5, 52.4.

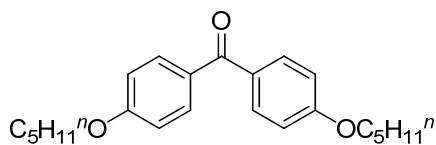

**3m**: colorless oil; <sup>1</sup>H NMR (500 MHz, CDCl<sub>3</sub>, TMS)  $\delta$  (ppm) 8.05 (dt,  $J=2.5, 9.5$ Hz, 4H), 6.93 (dt,  $J=2.5, 9.5$  Hz, 4H), 4.03 (t,  $J=6.5$  Hz, 4H), 1.80-1.84 (m, 4H), 1.37-1.47 (m, 8H), 0.94 (t,  $J=6.5$  Hz, 6H); <sup>13</sup>C NMR (125 MHz, CDCl<sub>3</sub>, TMS)  $\delta$  (ppm) 170.8, 163.9, 132.5, 121.4, 114.4, 68.5, 29.0, 28.3, 22.6, 14.2. HRMS (ESI)  $m/z$ : [M+Na]<sup>+</sup> calcd for C<sub>23</sub>H<sub>30</sub>O<sub>3</sub>Na, 377.2087; found: 377.2096.

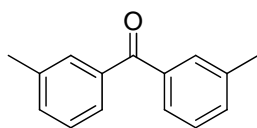

**3n**<sup>[9]</sup>: colorless oil; <sup>1</sup>H NMR (500 MHz, CDCl<sub>3</sub>, TMS)  $\delta$  (ppm) 7.63 (s, 2H), 7.57 (d,  $J=7.5$  Hz, 2H), 7.34-7.41 (m, 4H), 2.42 (s, 6H); <sup>13</sup>C NMR (125 MHz, CDCl<sub>3</sub>, TMS)  $\delta$  (ppm) 197.4, 138.3, 138.0, 133.3, 130.6, 128.2, 127.6, 21.6.

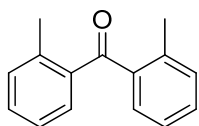

**3o**<sup>[9]</sup>: white solid, mp 64 °C; <sup>1</sup>H NMR (500 MHz, CDCl<sub>3</sub>, TMS)  $\delta$  (ppm) 7.39 (td,  $J=1.5, 7.5$  Hz, 2H), 7.31 (dd,  $J=1.5, 7.5$  Hz, 2H), 7.28 (dd,  $J=1.0, 7.5$  Hz, 2H), 7.20 (td,  $J=1.0, 7.5$  Hz, 2H), 2.44 (s, 6H); <sup>13</sup>C NMR (125 MHz, CDCl<sub>3</sub>, TMS)  $\delta$  (ppm) 201.0, 139.2, 138.4, 131.6, 131.3, 130.5, 125.6, 20.9.

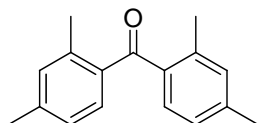

**3p**: colorless oil; <sup>1</sup>H NMR (500 MHz, CDCl<sub>3</sub>, TMS)  $\delta$  (ppm) 7.21 (d,  $J=2.5$ Hz, 2H), 7.08 (s, 2H), 6.99 (d,  $J=2.5$  Hz, 2H), 2.41 (s, 6H), 2.36 (s, 6H); <sup>13</sup>C NMR (125 MHz, CDCl<sub>3</sub>, TMS)  $\delta$  (ppm) 200.4, 141.3, 138.3, 136.5, 132.2, 130.6, 127.6. HRMS (ESI)  $m/z$ : [M+1]<sup>+</sup> calcd for C<sub>17</sub>H<sub>19</sub>O, 239.1430; found: 239.1433.

#### 4. References

- [1] V. Percec, J.-Y. Bae, M. Zhao, D. H. Hill, *J. Org. Chem.* **1995**, *60*, 176.
- [2] N. Ma, Z. Zhu, Y. Wu, *Tetrahedron* **2007**, *63*, 4625.
- [3] K. Mitsudo, T. Shiraga, D. Kagen, D. Shi, J. Y. Becker, H. Tanaka, *Tetrahedron* **2009**, *65*, 8384.
- [4] N. Nishimura, K. Yoza, K. Kobayashi, *J. Am. Chem. Soc.* **2010**, *132*, 777.
- [5] I. Kania-Korwe, S. Parkin, L. W. Robertson, H.-J. Lehmler, *Chemosphere* **2004**, *56*, 735.
- [6] M. L. N. Rao, V. Venkatesh, D. Banerjee, *Tetrahedron* **2007**, *63*, 12917.
- [7] D. Bottalico, V. Fiandanese, G. Marchese, A. Punzi, *Synthesis* **2009**, 2316.
- [8] N. Imai, *Okayama Rika Daigaku Kiyo, A: Shizen Kagaku* **2003**, *39A*, P47-55.
- [9] K. Kikukawa, T. Idemoto, A. Katayama, K. Kono, F. Wada, T. Matsuda, *J. Chem. Soc., Perkin Trans. I*, **1987**, 1511.
- [10] T. H. H. Hsieh, V. M. Dong, *Tetrahedron* **2009**, *65*, 3062.
- [11] W.-B., Yi, C. Cai, *J. Fluor. Chem.* **2005**, *126*, 1191.

#### 5. Copies of $^1\text{H}$ and $^{13}\text{C}$ NMR spectra of products 2a-6l, 3a-3c, 3d-3h, 3k, 3m-3p



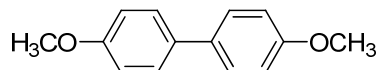

**2a**

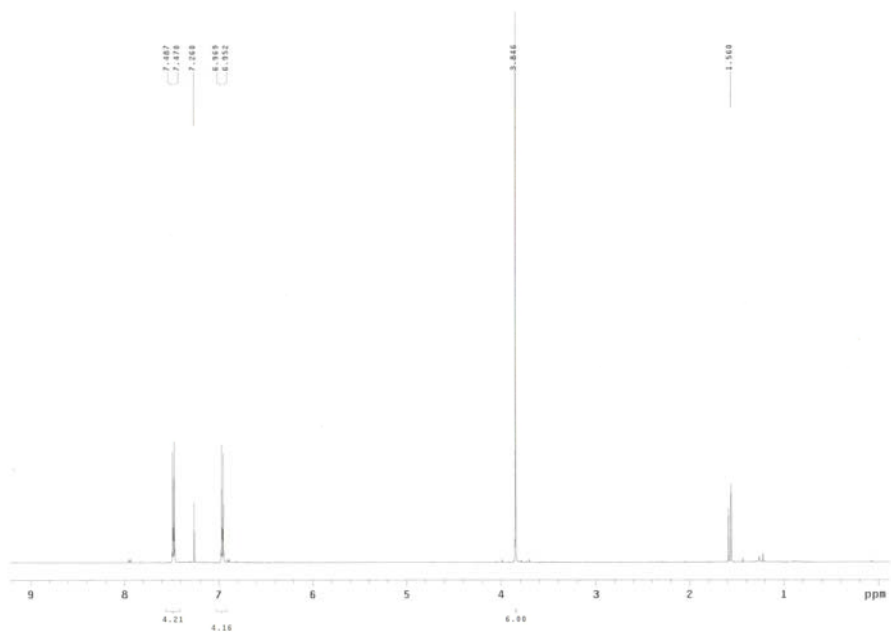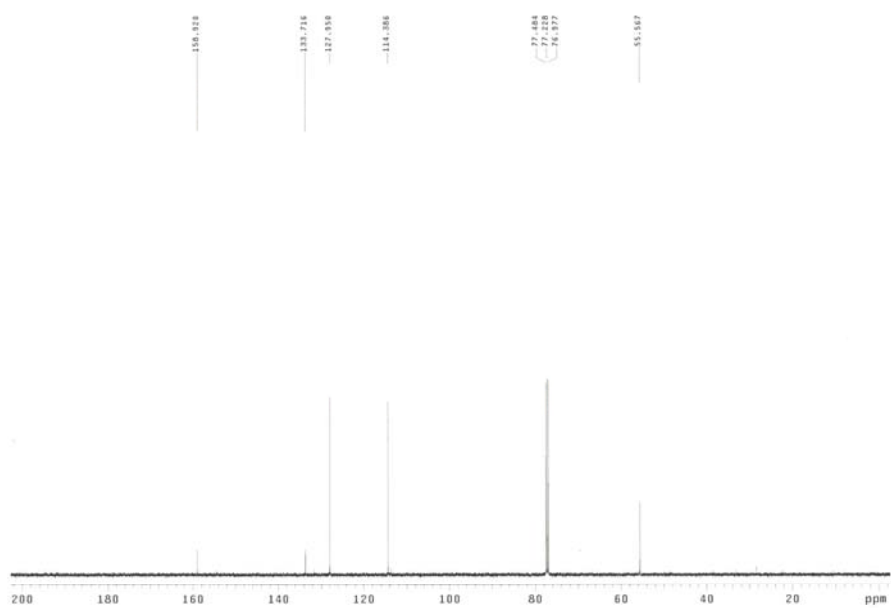

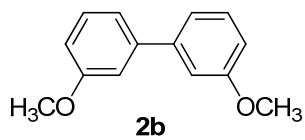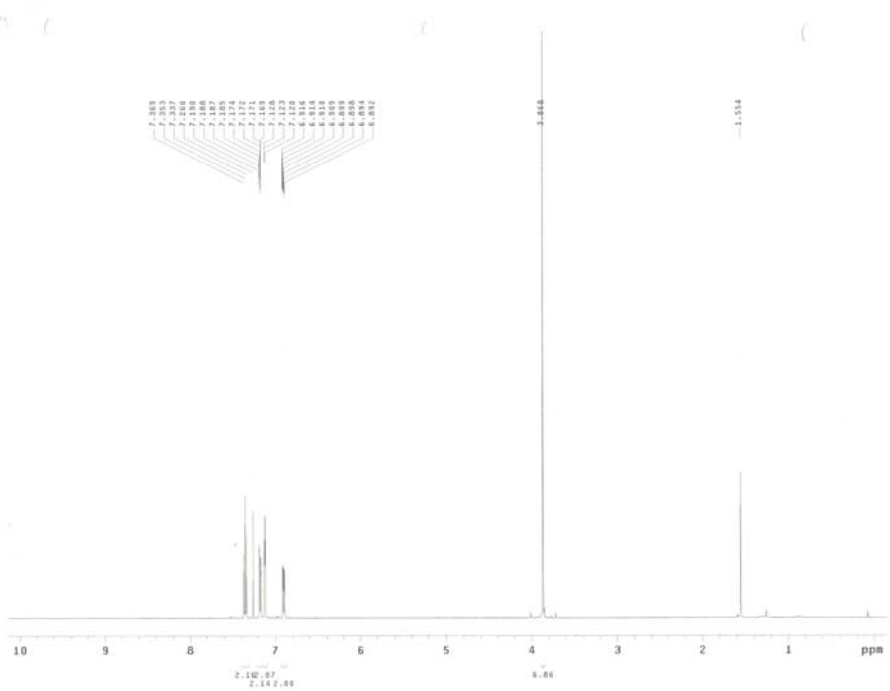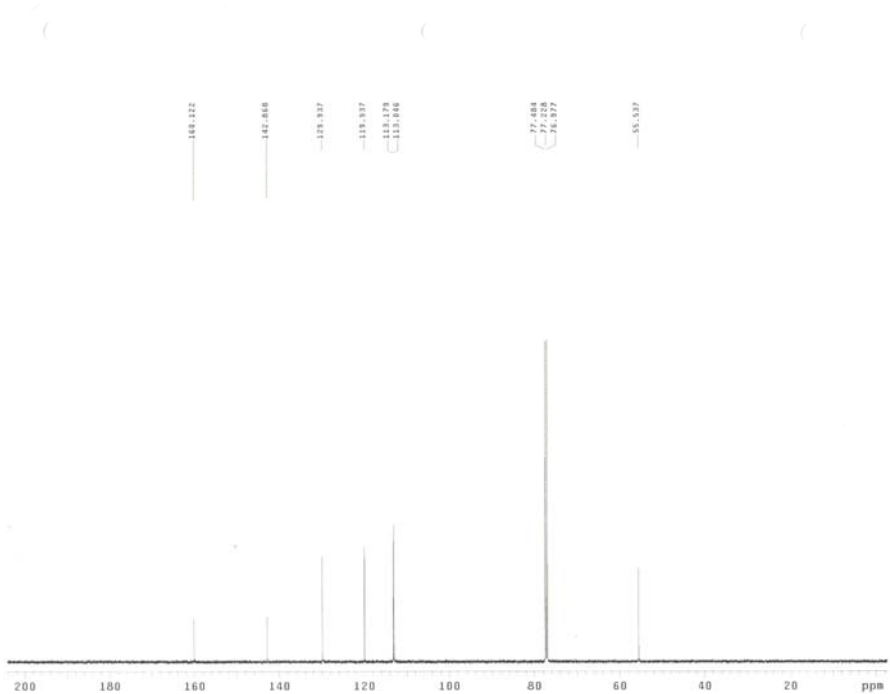

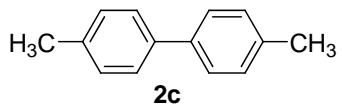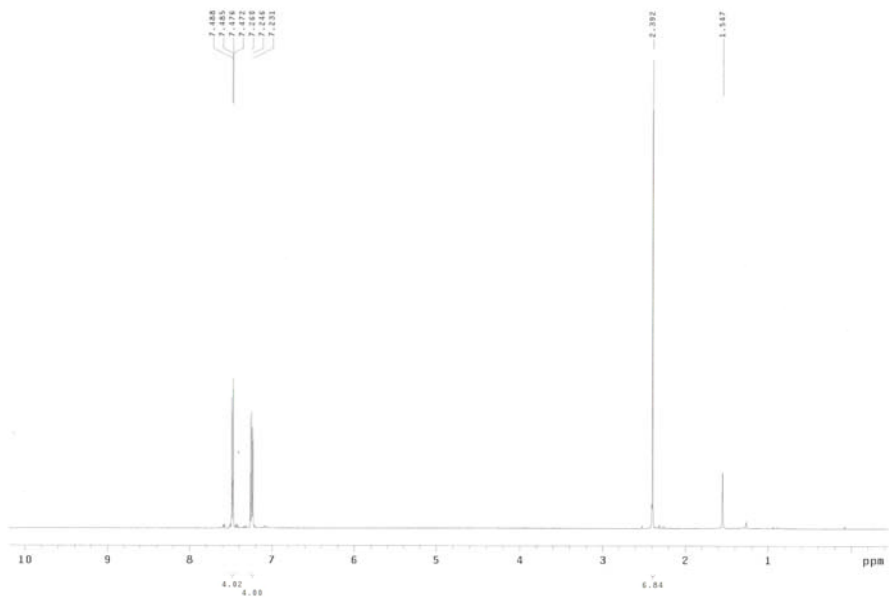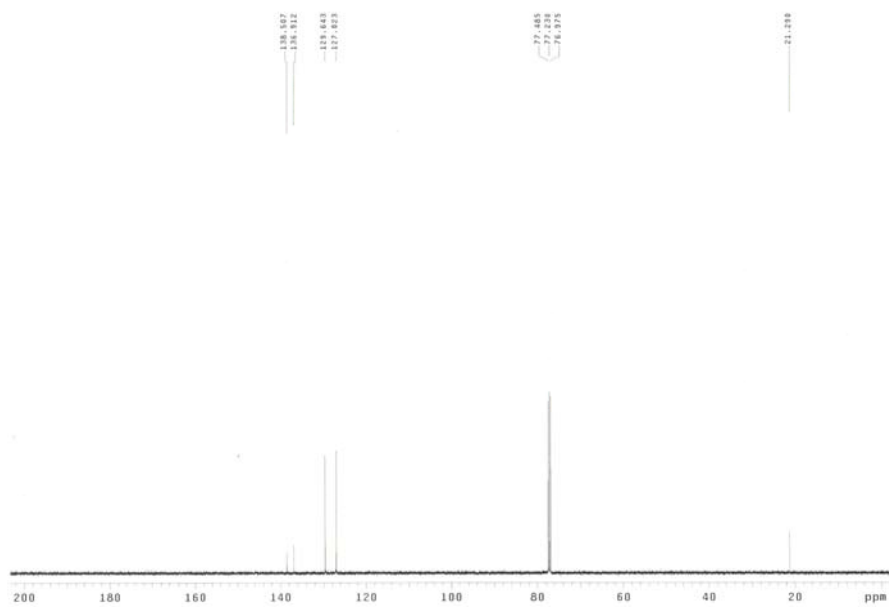

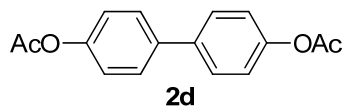

706 pt pt PPT - CDL

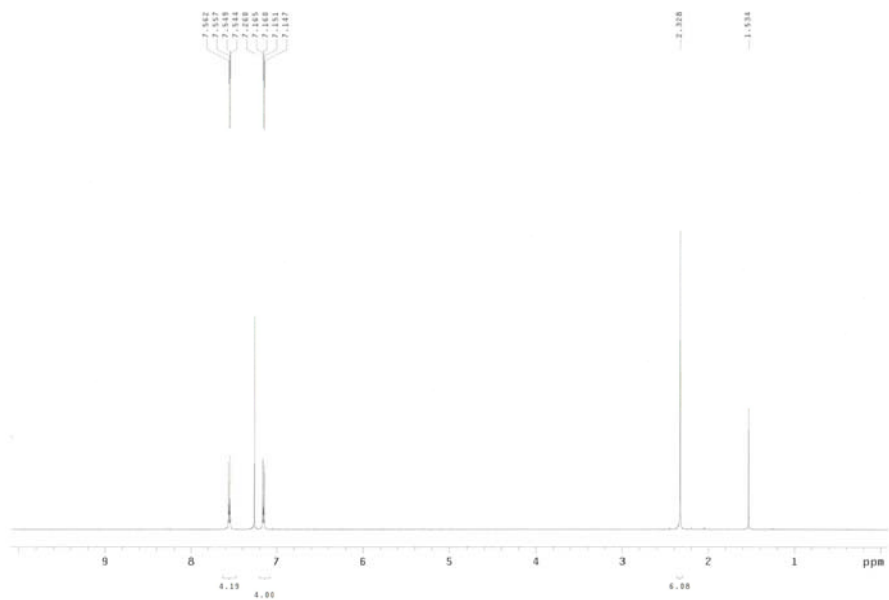

16-CDL

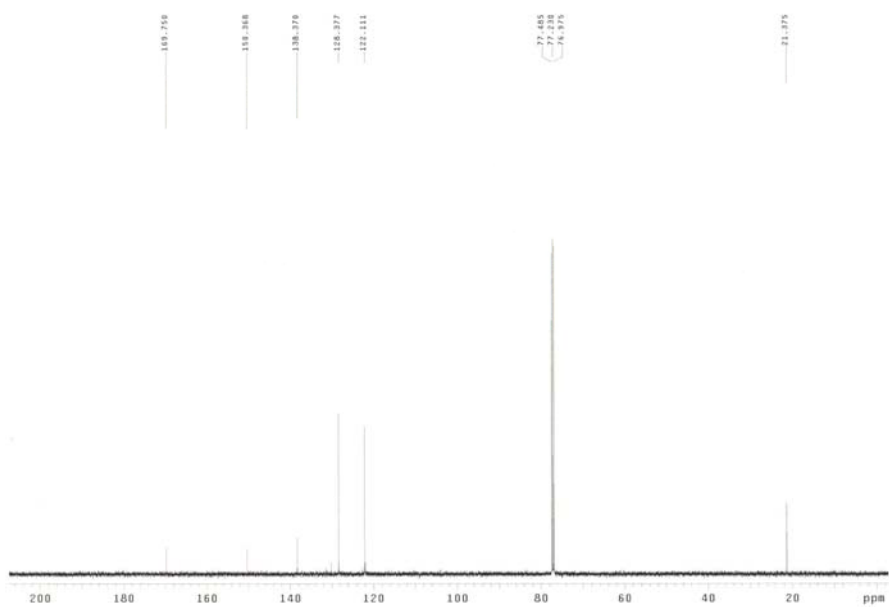

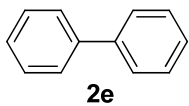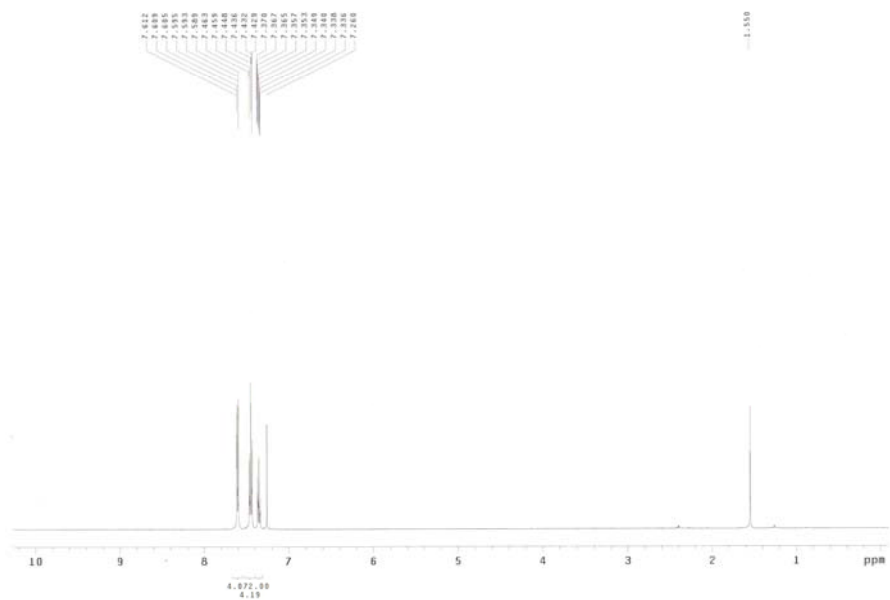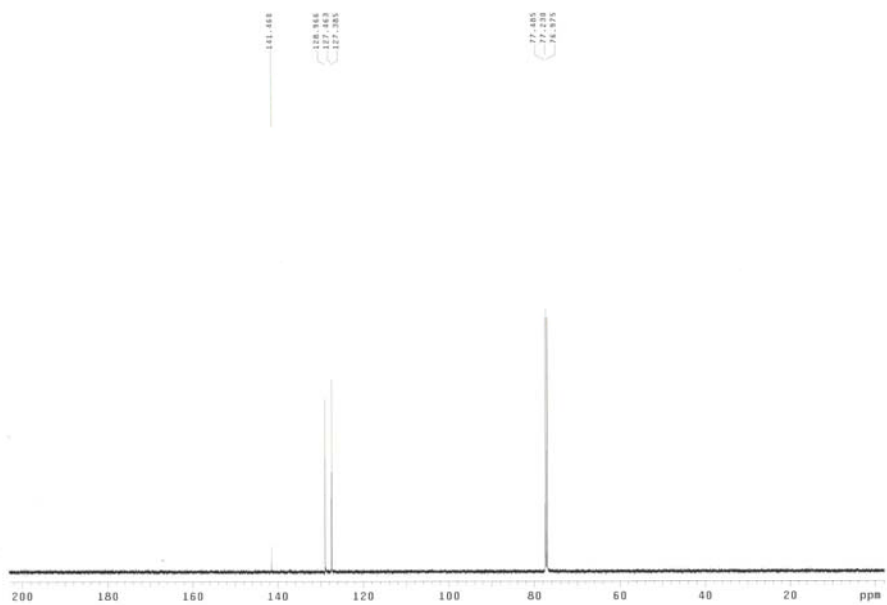



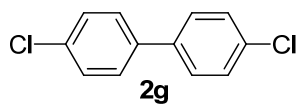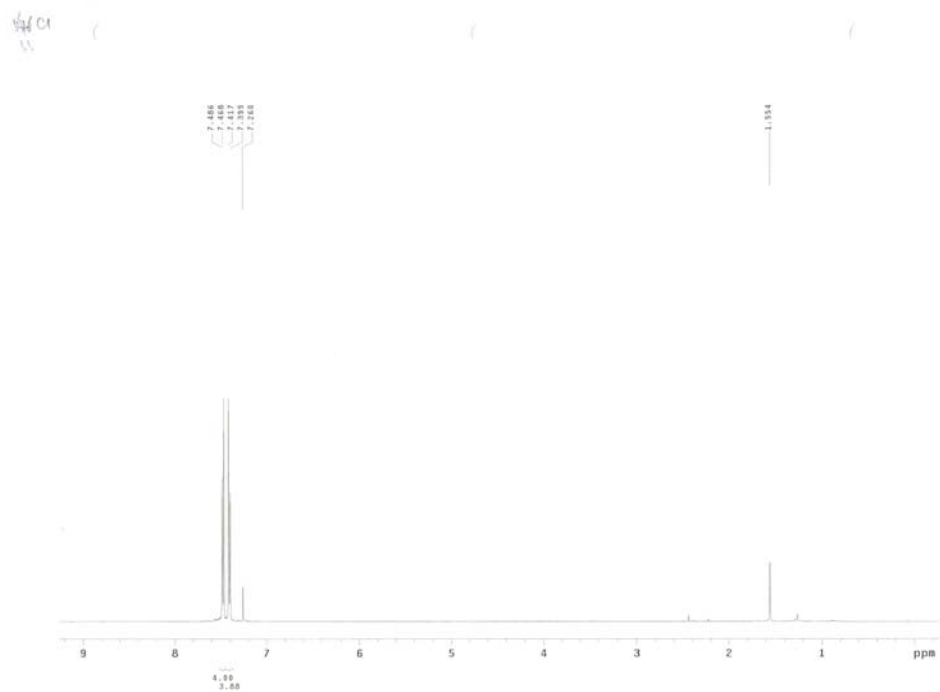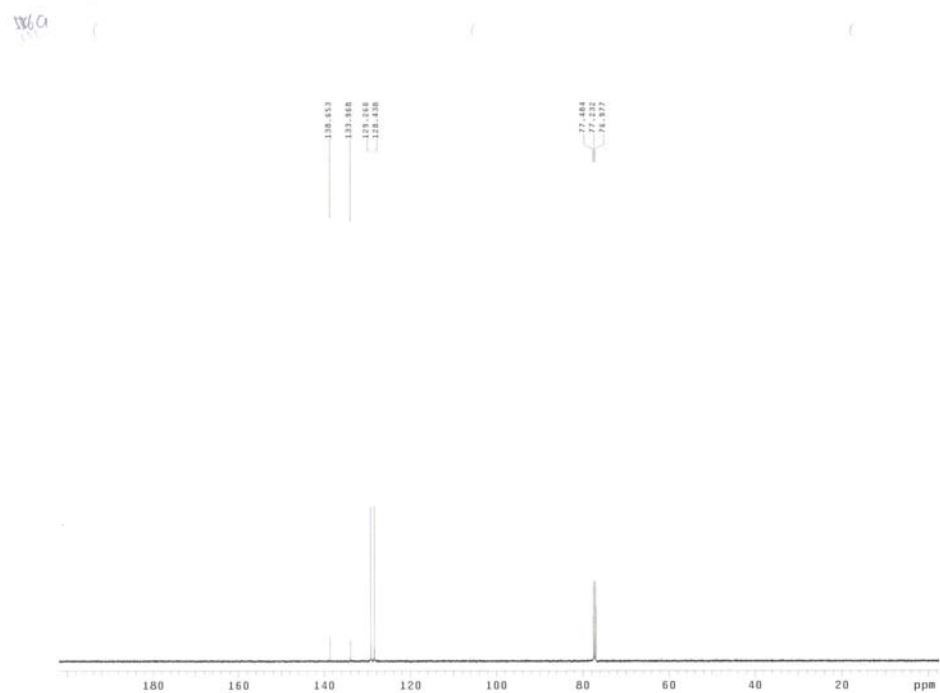

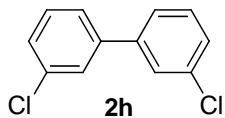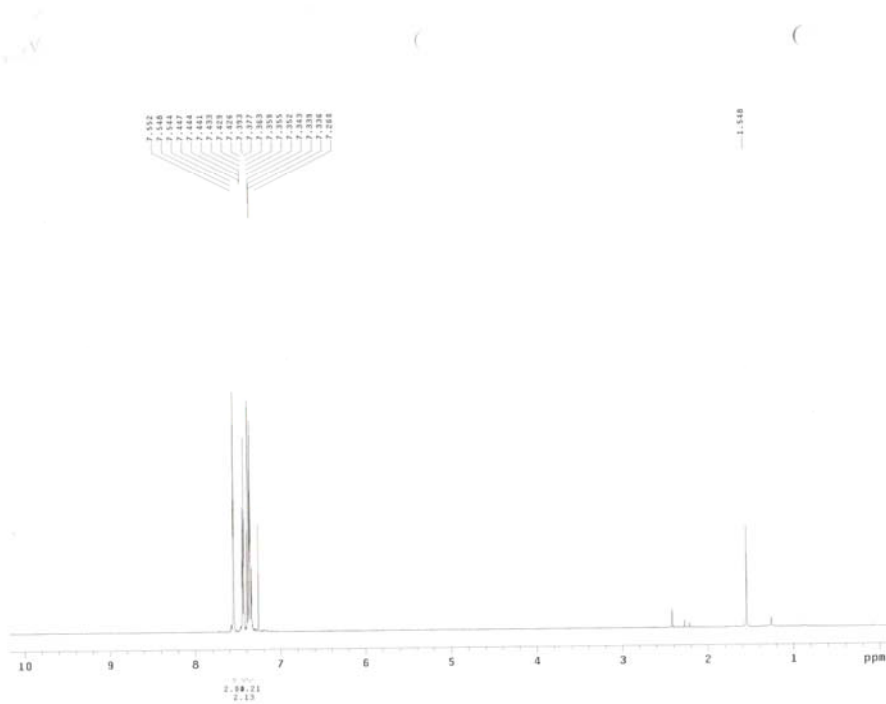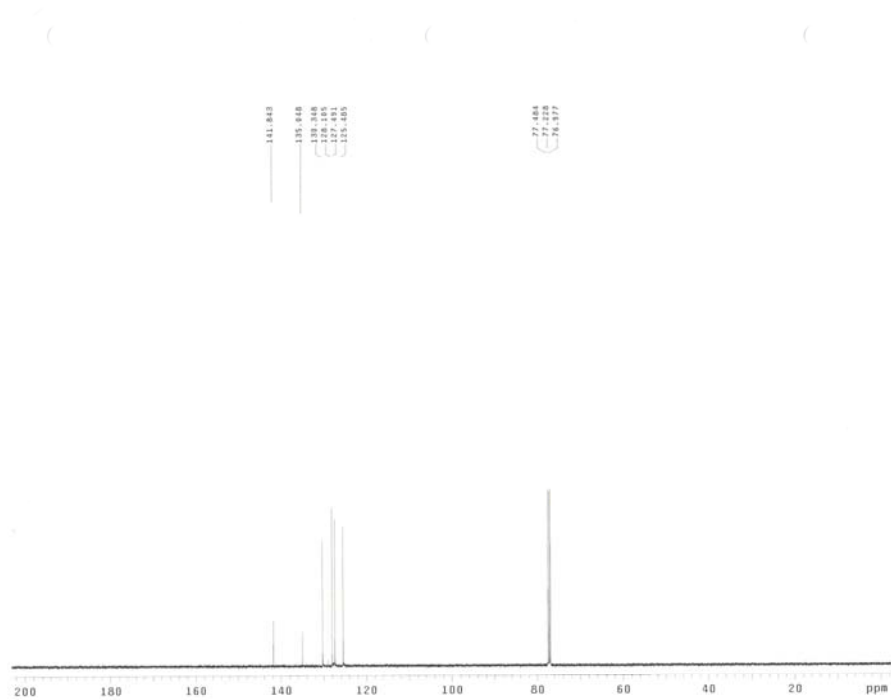



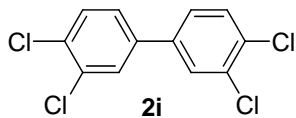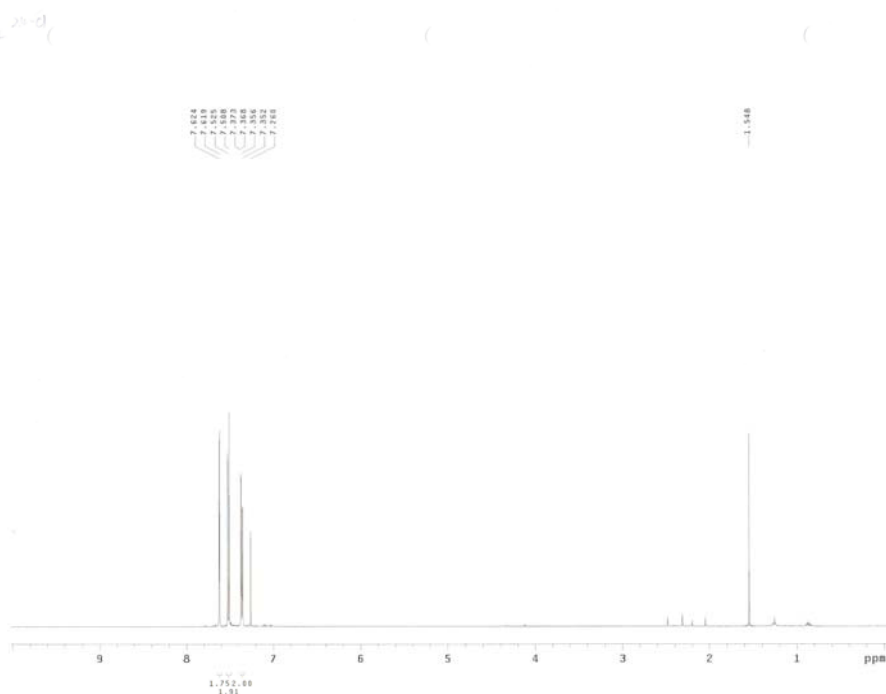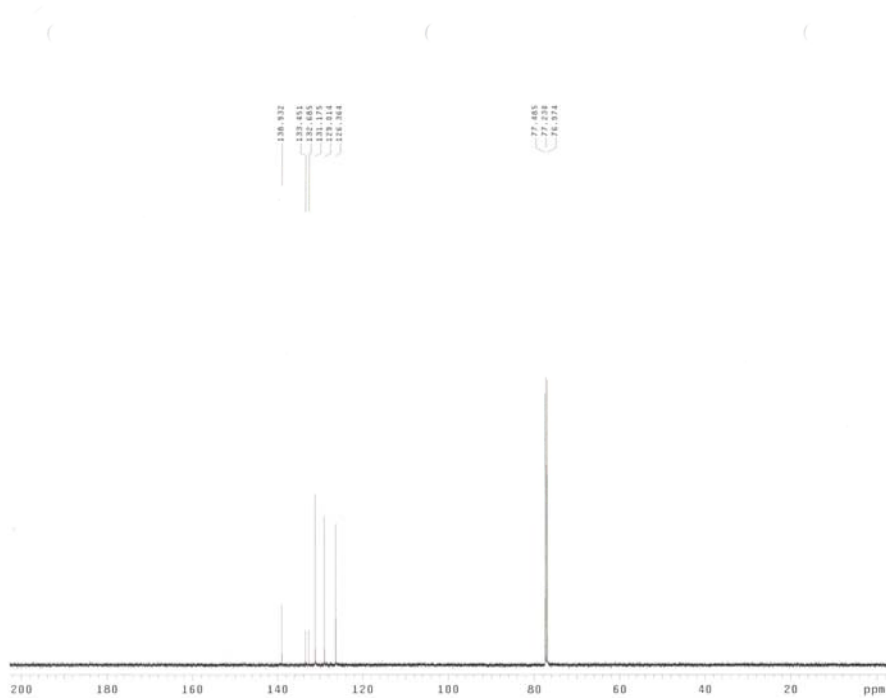

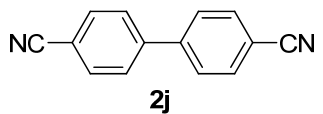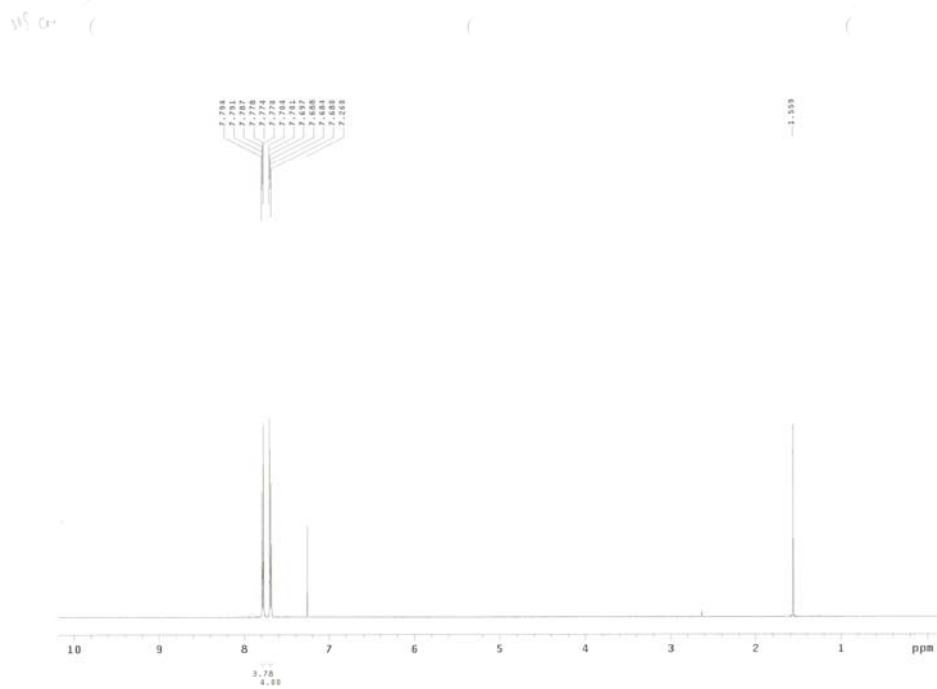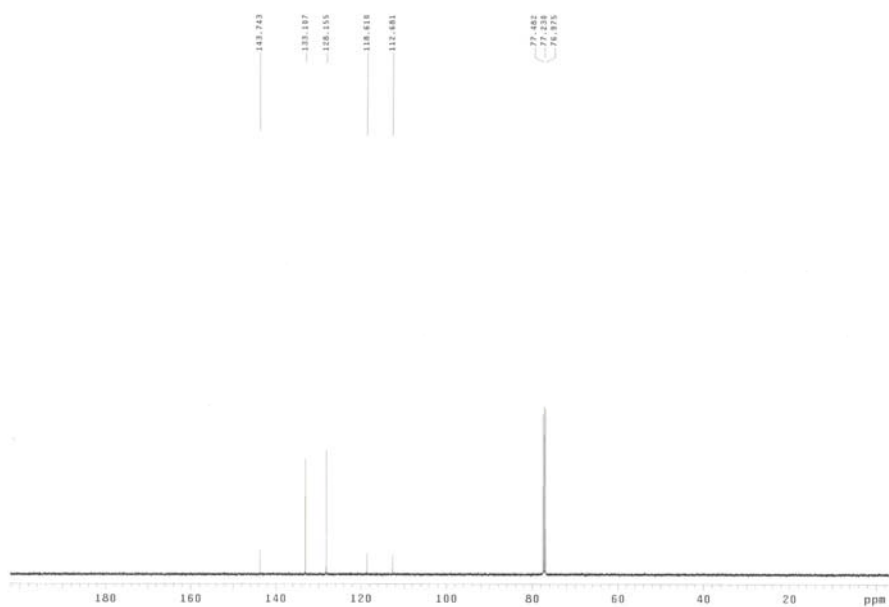

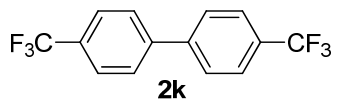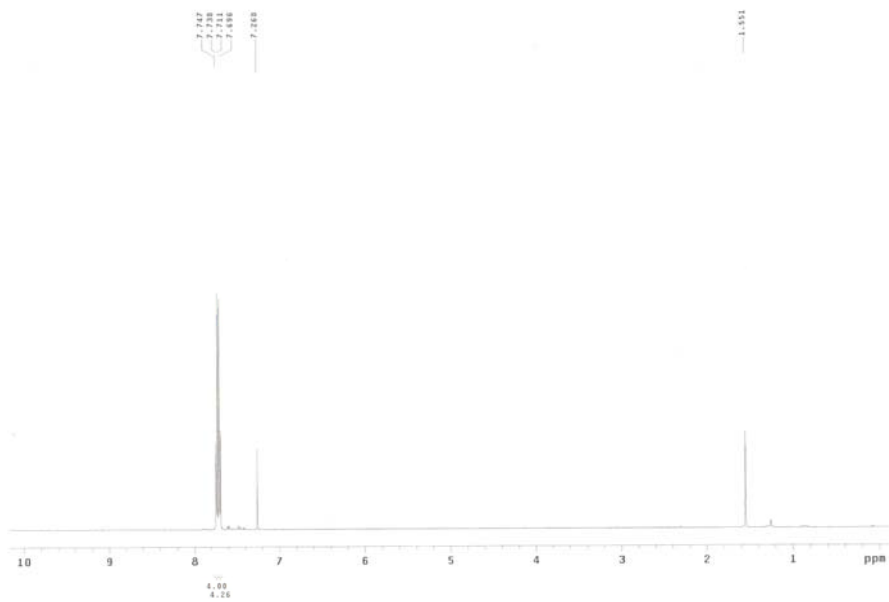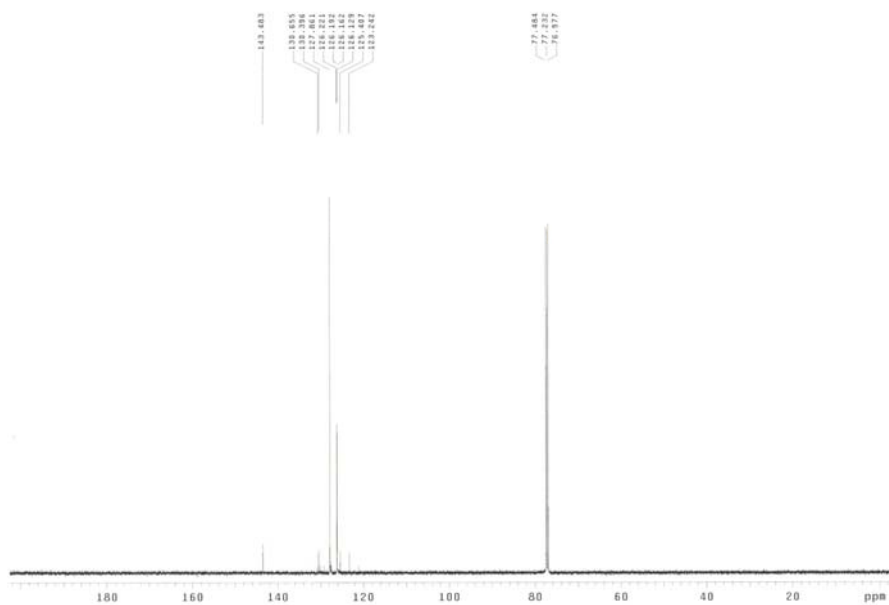

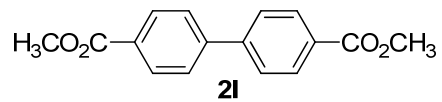

21 <sup>1</sup>H NMR

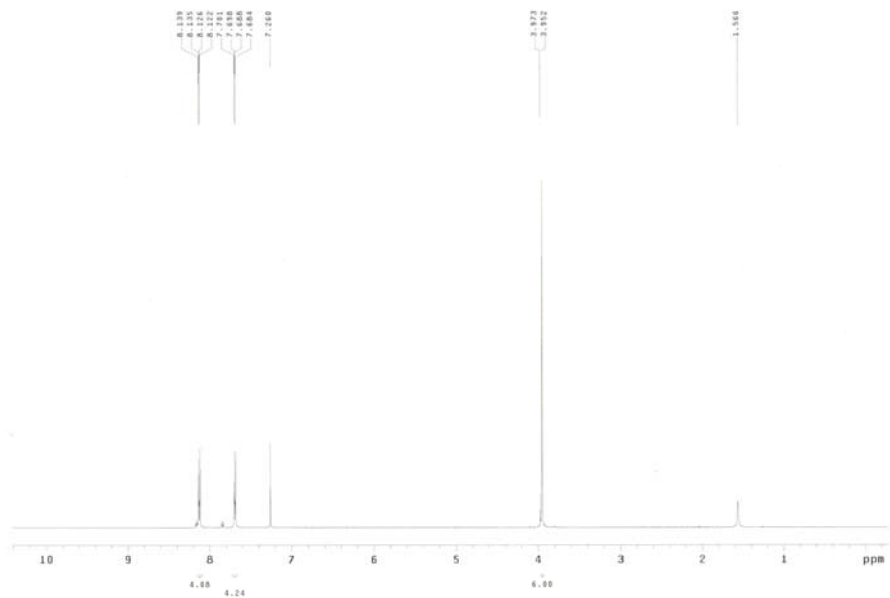

21 <sup>13</sup>C NMR

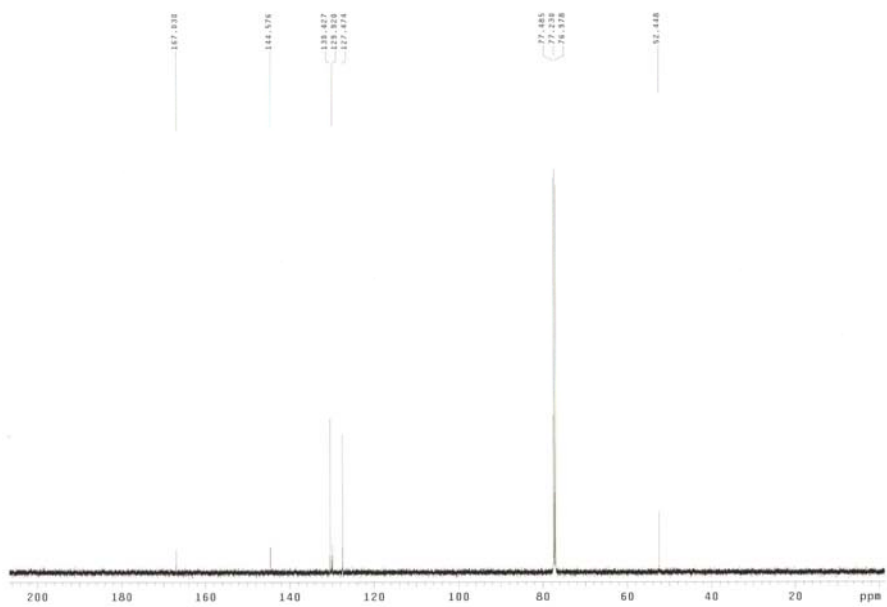

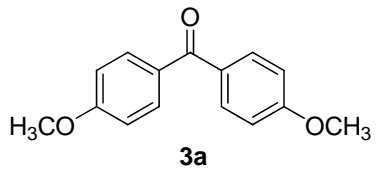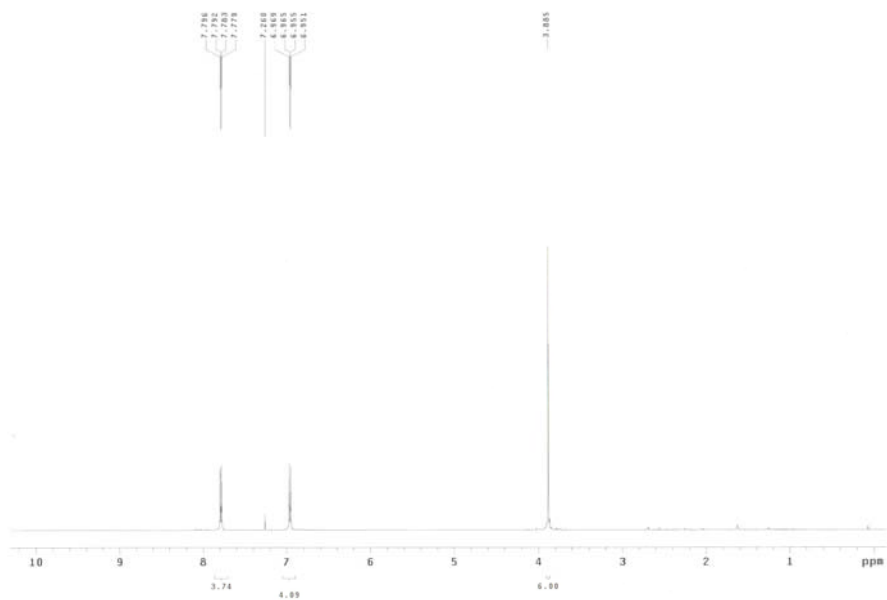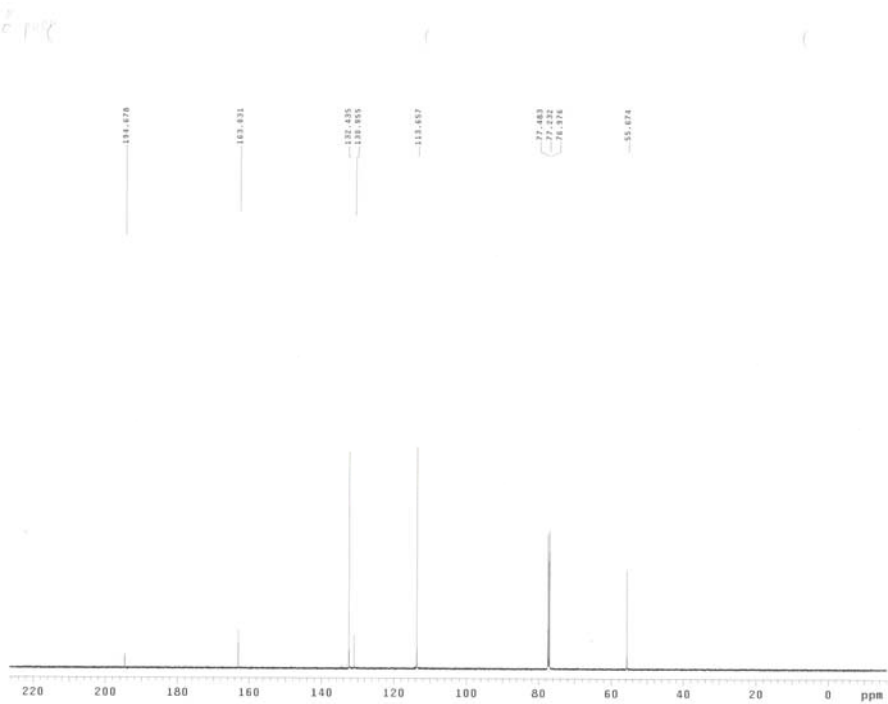



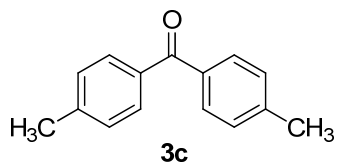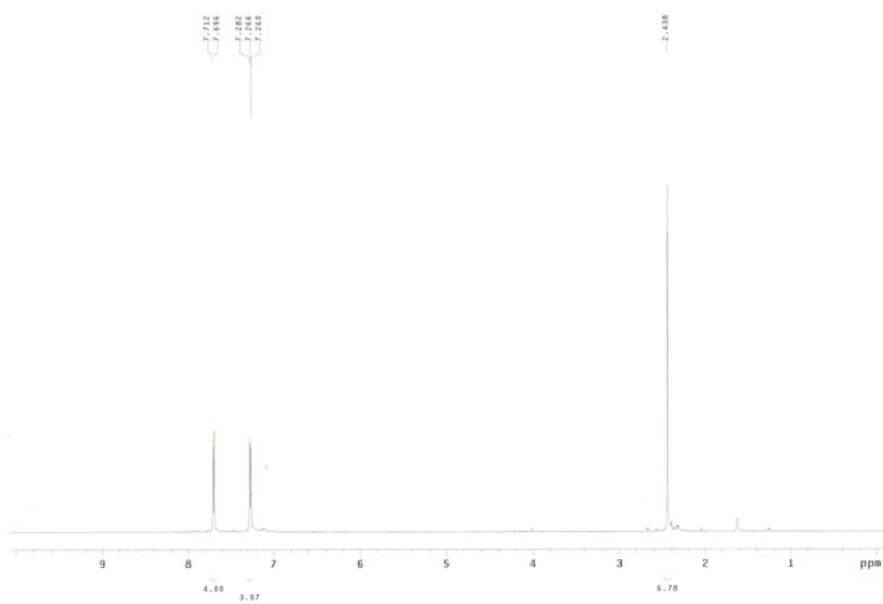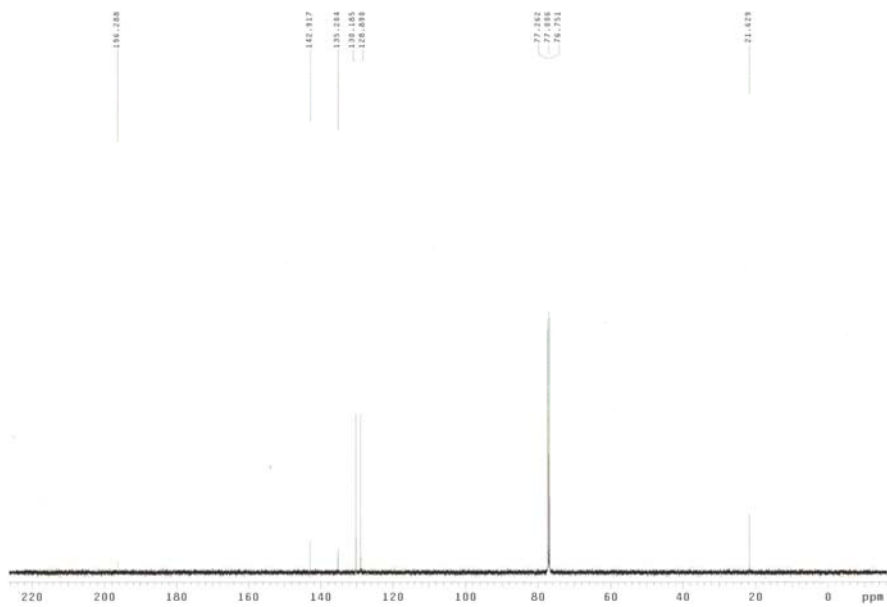

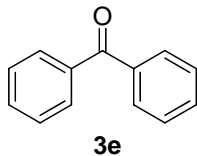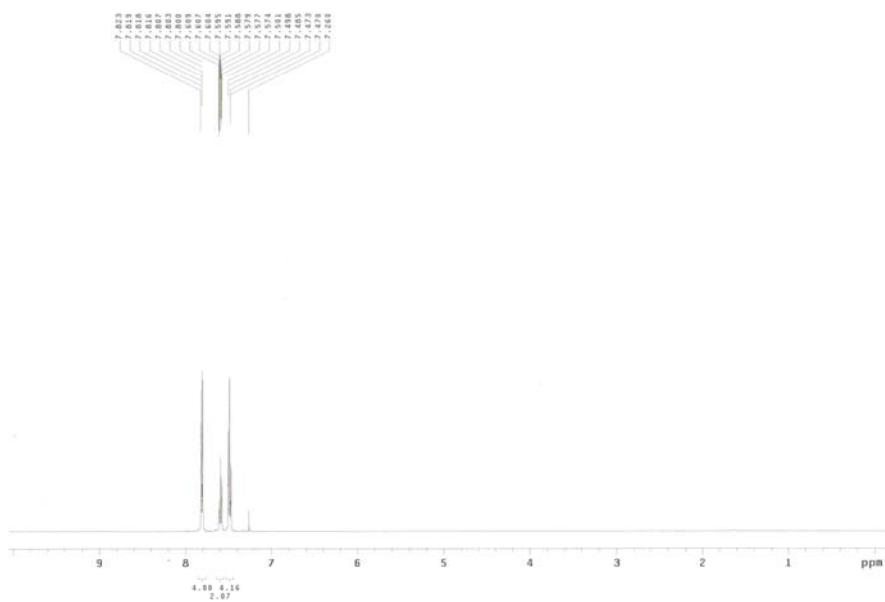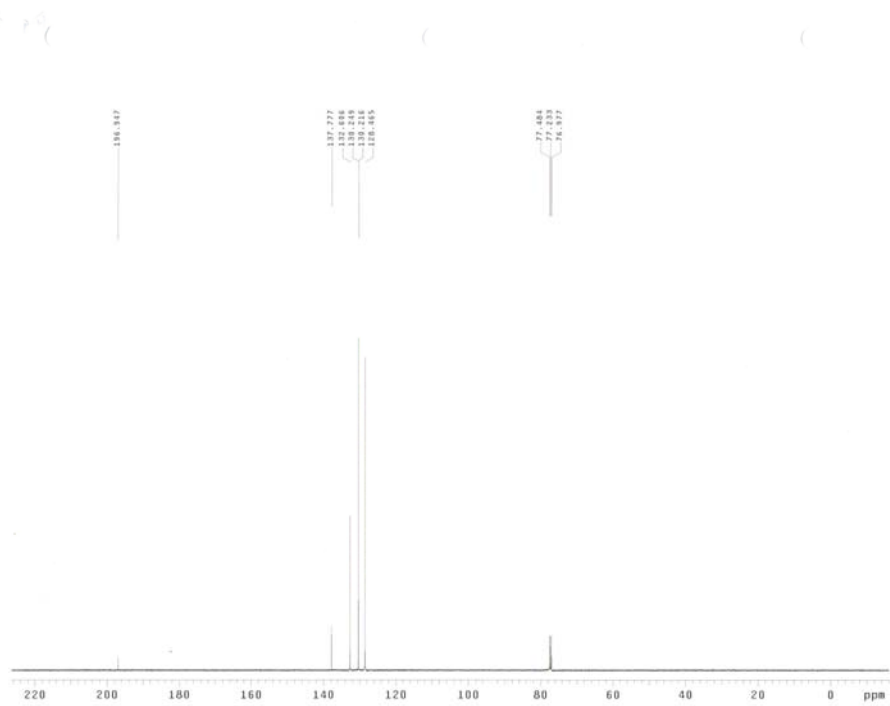



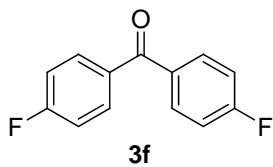

7.158

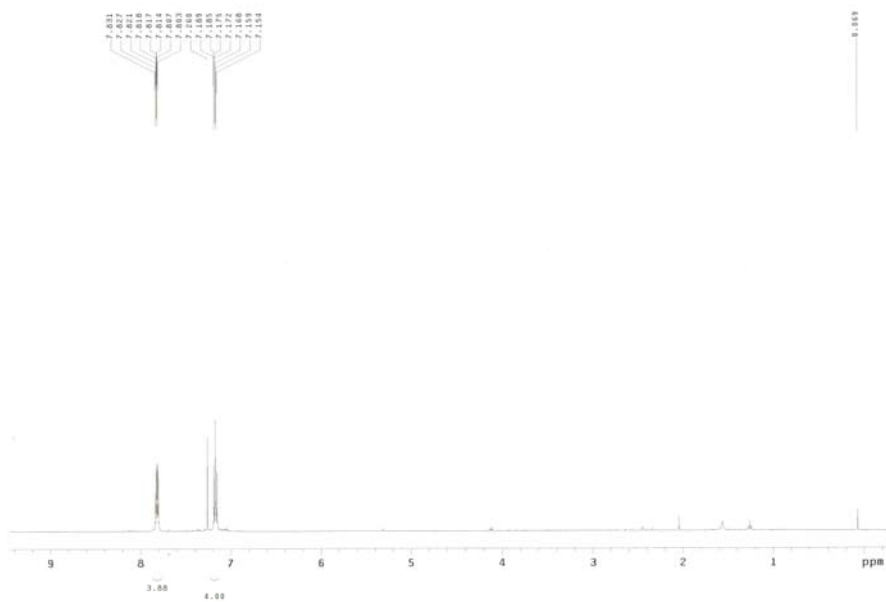

154.045

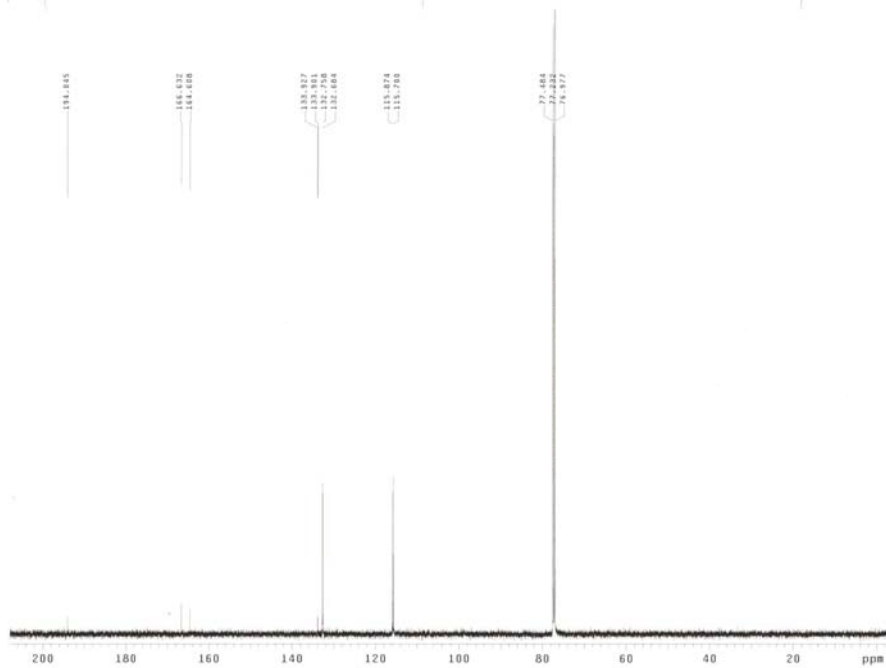

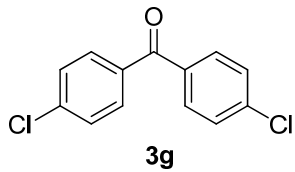

3g (1.0g)

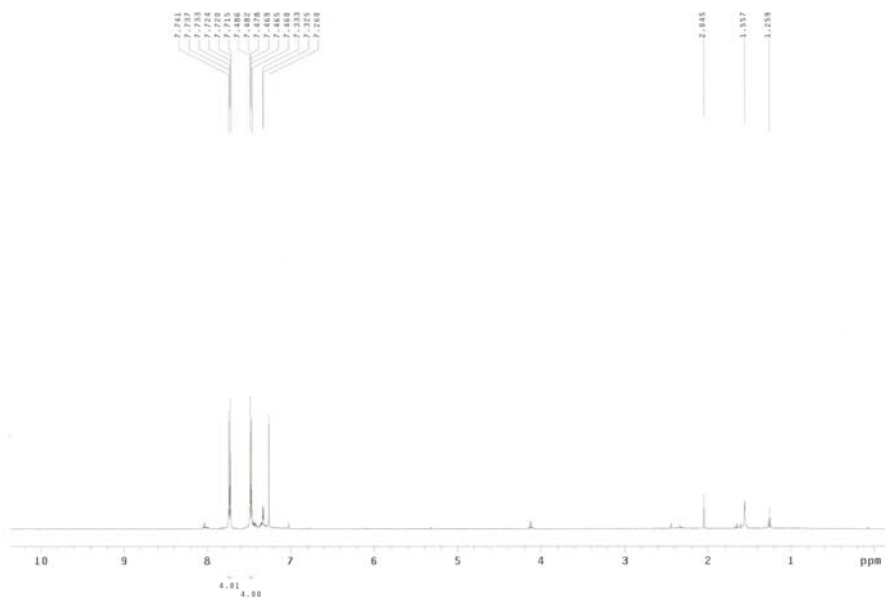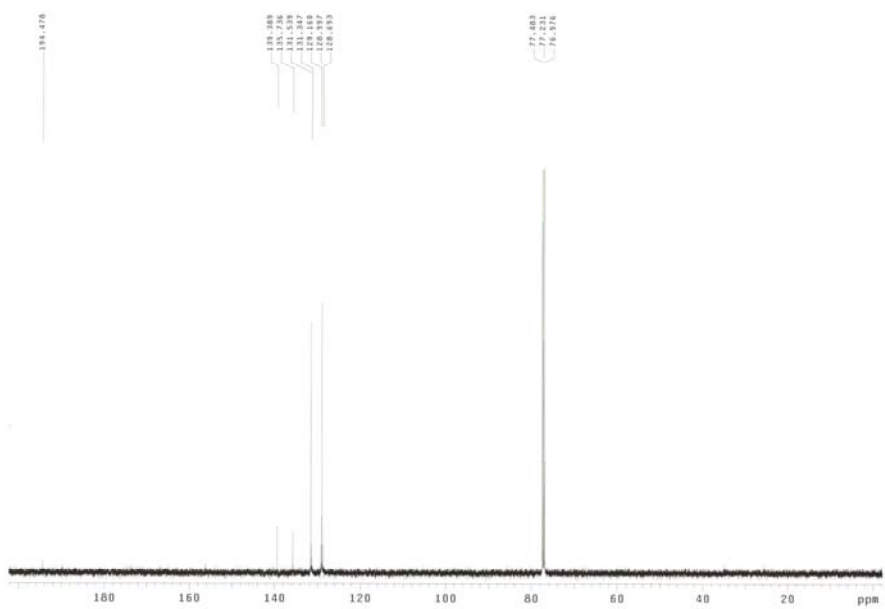

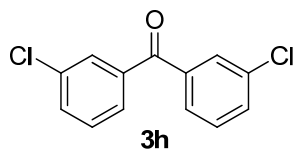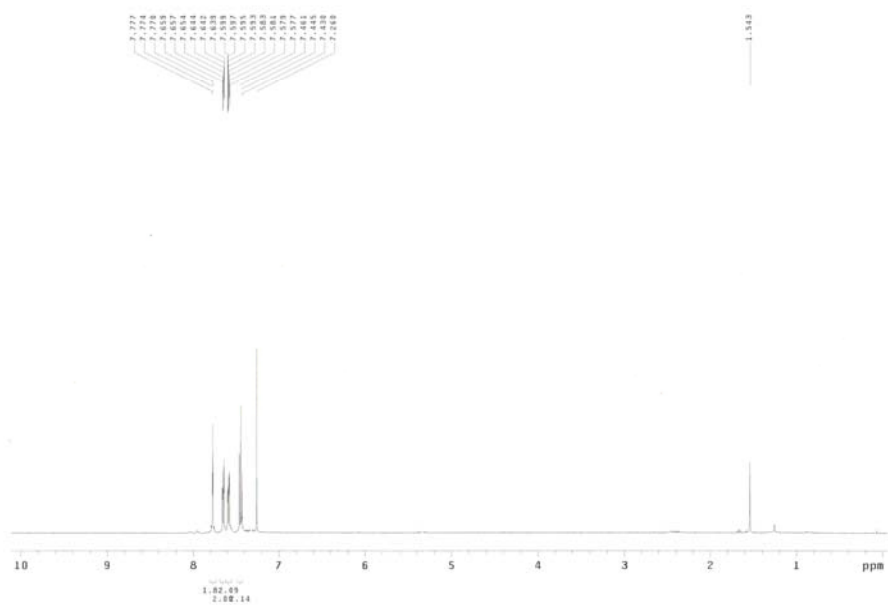

谱表如下

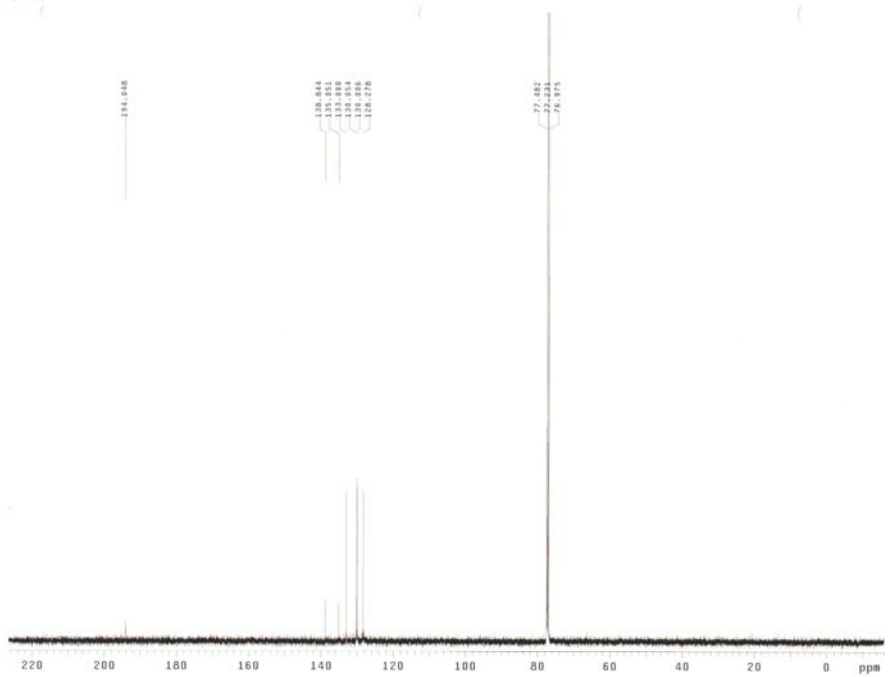



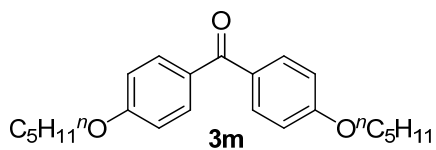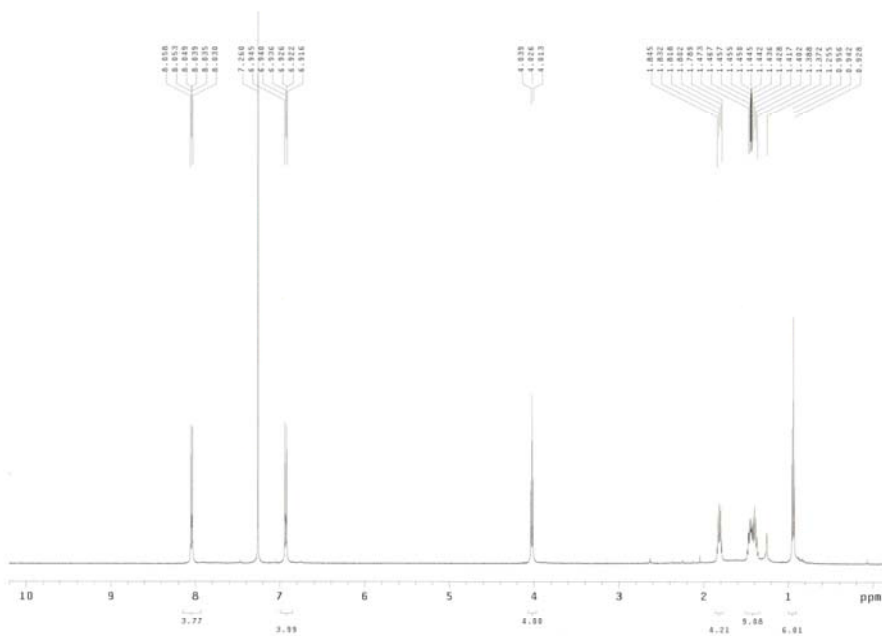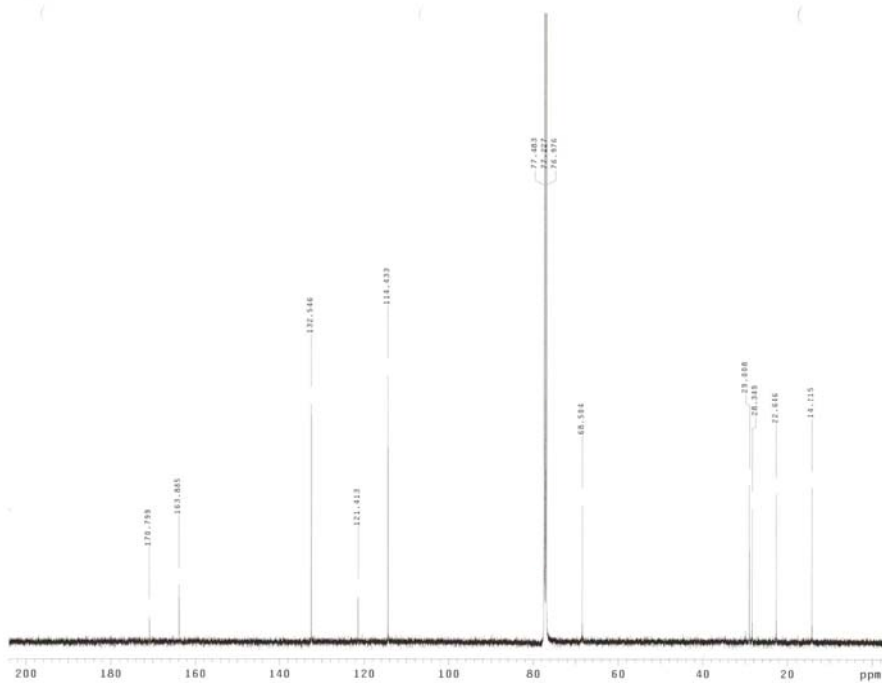

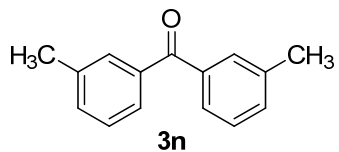

)))

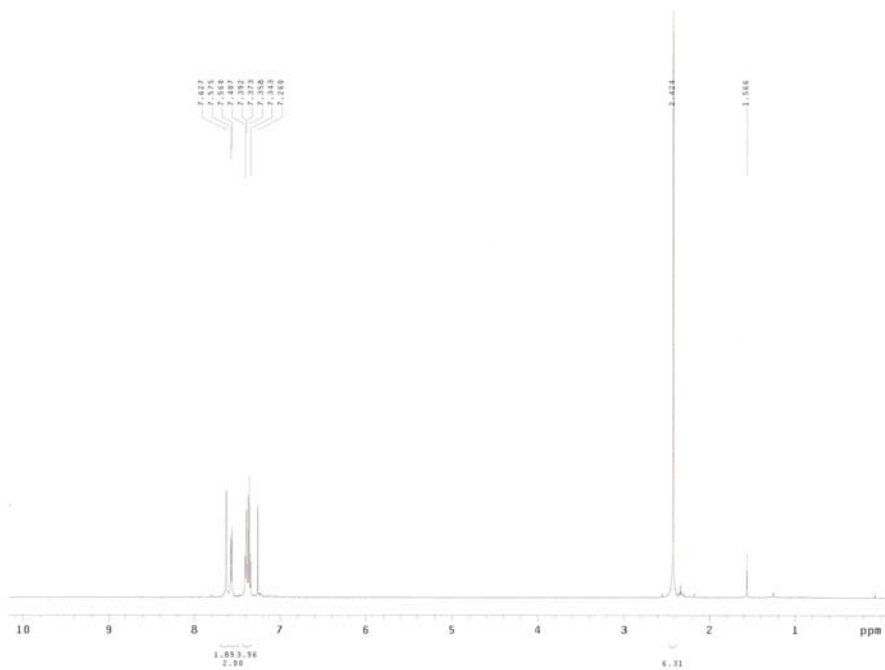

)))

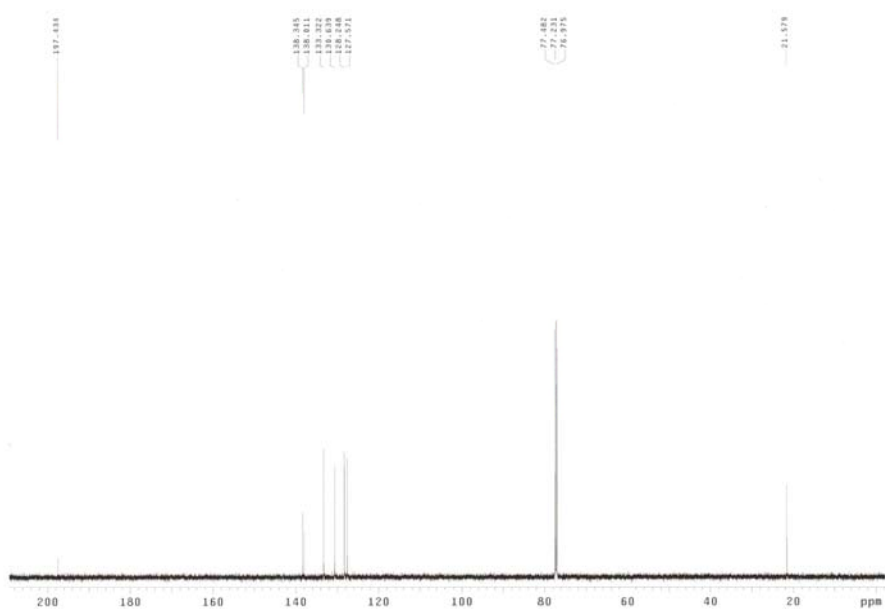



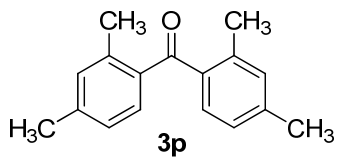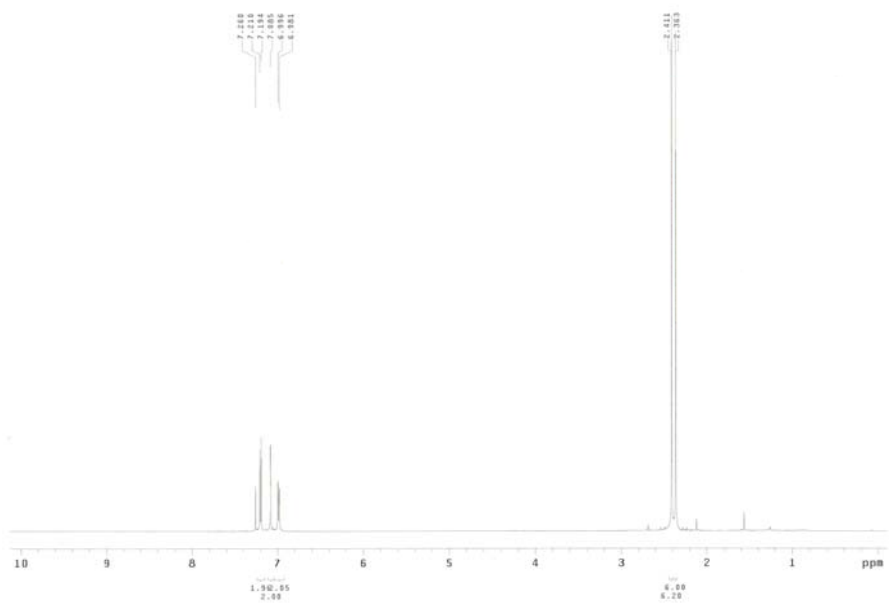

(2) 25 °C

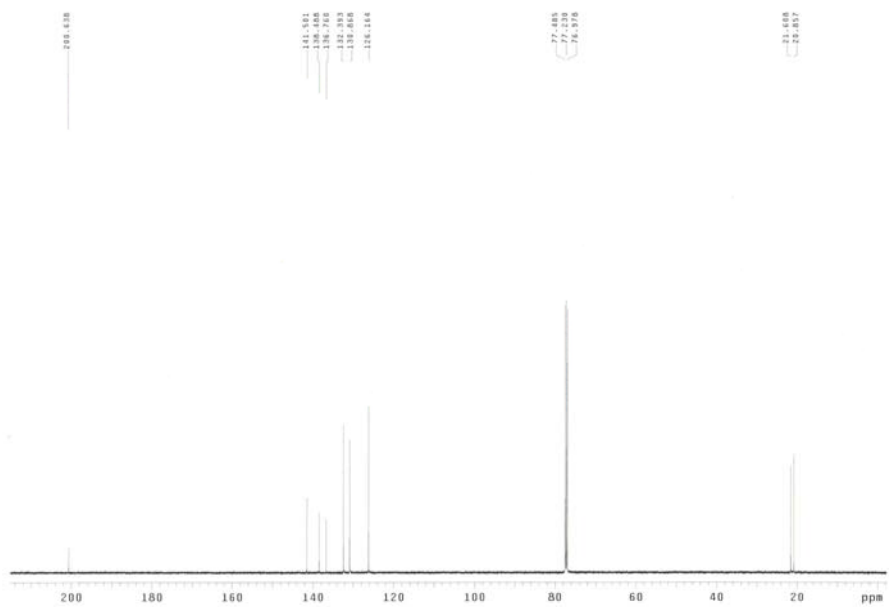

Supplement: c0cc04921b.pdf [file c0cc04921b.pdf]
